# Supplementary material
Source: Springer Nature journal article supplement (https://www.springermedizin.de/resource/supplementary/12967_2010_695_MOESM2_ESM.pdf/9577298)

(A)

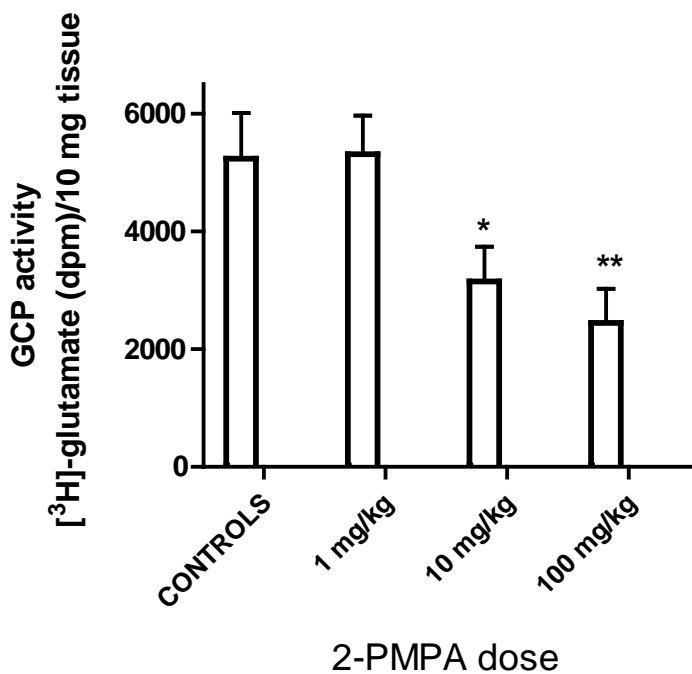

(B)

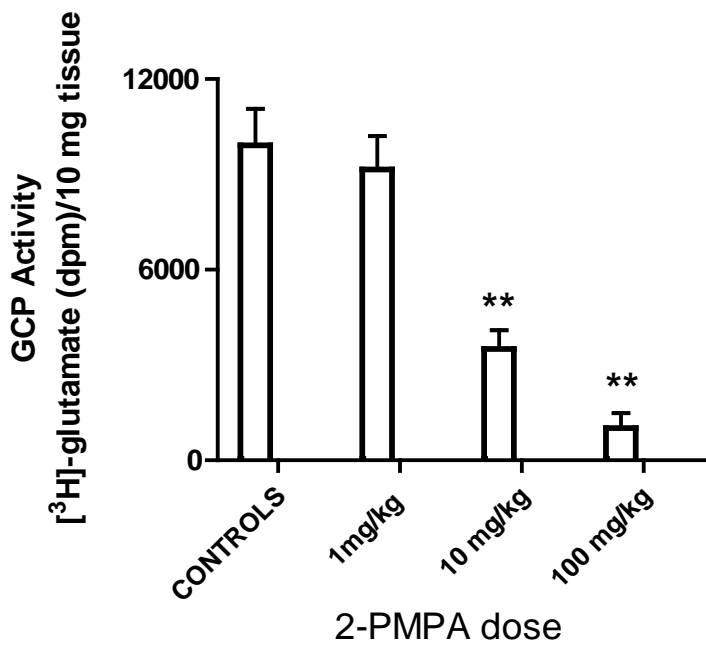

Supplement: MOESM2 [file 9577298]
